# 1 **Biallelic mutations in cancer genomes reveal local mutational determinants**

2

3 Jonas Demeulemeester<sup>1,2\*</sup>, Stefan C. Dentre<sup>3,4</sup>, Moritz Gerstung<sup>3,4</sup>, Peter Van Loo<sup>1\*</sup>

4

5 <sup>1</sup> Cancer Genomics Laboratory, The Francis Crick Institute, London NW1 1AT, UK

6 <sup>2</sup> Department of Human Genetics, KU Leuven, 3000 Leuven, Belgium

7 <sup>3</sup> European Molecular Biology Laboratory - European Bioinformatics Institute (EMBL-EBI),  
8 Hinxton, Cambridgeshire CB10 1SA, UK

9 <sup>4</sup> Wellcome Sanger Institute, Hinxton, Cambridgeshire CB10 1SA, UK

10

11 \* e-mail: [jonas.demeulemeester@crick.ac.uk](mailto:jonas.demeulemeester@crick.ac.uk); [peter.vanloo@crick.ac.uk](mailto:peter.vanloo@crick.ac.uk)

12

13 **The infinite sites model of molecular evolution requires that every position in the genome**  
14 **is mutated at most once<sup>1</sup>. It is a cornerstone of tumour phylogenetic analysis<sup>2</sup>, and is often**  
15 **implied when calling, phasing and interpreting variants<sup>3,4</sup> or studying the mutational**  
16 **landscape as a whole<sup>5</sup>. Here we identify 20,555 biallelic mutations, where the same base**  
17 **is mutated independently on both parental copies, in 722 (26.0%) bulk sequencing**  
18 **samples from the Pan-Cancer Analysis of Whole Genomes study (PCAWG). Biallelic**  
19 **mutations reveal UV damage hotspots at ETS and NFAT binding sites, and hypermutable**  
20 **motifs in *POLE*-mutant and other cancers. We formulate recommendations for variant**  
21 **calling and provide frameworks to model and detect biallelic mutations. These results**  
22 **highlight the need for accurate models of mutation rates and tumour evolution, as well as**  
23 **their inference from sequencing data.**

24

25

26 Recent studies have shown systematic variation in mutation rates across the genome, resulting  
27 in specific hotspots<sup>5-7</sup>. In addition, breakdown of the infinite sites assumption at the scale of  
28 individual single nucleotide variants (SNVs) was flagged up in single cell tumour sequencing  
29 data as a potential confounder during phylogenetic reconstruction<sup>8</sup>. It is unclear however,  
30 whether mutational recurrence is likely to be observed in practice within bulk tumour samples.  
31 Population averaging and limited long-range information carried by short-read bulk  
32 sequencing make it difficult to directly assess the validity of the infinite sites model.

33

34 During the evolution of a single diploid lineage, four classes of infinite sites model violations  
35 may be considered (**Figure 1**): (i) biallelic parallel, where two alleles independently mutate to  
36 the same alternate base; (ii) biallelic divergent, by independent mutation of two alleles, each to  
37 another base; (iii) monoallelic forward, where one variant is mutated to another; and (iv)  
38 monoallelic back, whereby an earlier variant reverts back to wild type. We focus on biallelic  
39 mutations – which can also serve as a proxy for parallel events in different lineages –  
40 hypothesising these may be observed directly in bulk tumour genome sequencing data. Loss of  
41 a variant owing to large-scale genomic deletion is not considered, as it does not strictly  
42 contradict the infinite sites assumption, yet such events should be adequately assessed when  
43 interpreting cancer genomes<sup>2,8,9</sup>.

44

45 To assess the landscape of infinite sites violations, we start with a simulation approach using  
46 the PCAWG dataset of 2,658 whole-genome sequenced cancers. We resample a tumour's  
47 observed mutations, preserving mutational signature exposures (96 mutation types,  
48 trinucleotide contexts)<sup>10,11</sup> but otherwise assuming uniform activity of mutational processes  
49 across the callable regions of a diploid genome (uniform permutation model; **Table S1**,  
50 **Methods**). Given that mutation rates are most certainly not uniform and that any deviation  
51 from uniformity will only increase the number of violations<sup>5</sup>, this derives a lower bound. Even  
52 at this lower bound, these simulations indicate at least one violation in 147 tumours (5.5%,  
53 **Figure 2a**). Overall, biallelic parallel mutations represent the most common class of infinite  
54 sites model violation, with different tumour types showing different contributions from the  
55 other classes. A second simulation approach, resampling (without replacement) mutations from  
56 tumours of the same cancer type with similar mutational signature activities, confirms these  
57 observations (neighbour resampling model; **Figure 2b**, **Table S2**, **Methods**). Consistent  
58 differences between the simulators, in the number of violations per tumour type, inform on the  
59 non-uniformity of the mutational processes, *i.e.* a reduced “effective genome size” (akin to the  
60 population genetics concept of effective population size). With a median 75-fold excess  
61 violations compared to the uniform permutation model, the effective genome size is smallest  
62 in Lymph-BNHL (  $\sim 2,782/75 = 37\text{Mb}$  ; **Figure 2c**, **Methods**), driven by somatic  
63 hypermutation recurrently targeting specific regions<sup>12</sup>.

64

65 The distinct preferences for parallel, divergent, forward and back mutation may be understood  
66 from the active mutational processes (**Figure 2d**). For instance, the dominant mutagenic  
67 activity of UV light in cutaneous melanoma (single base substitution signature 7a/b, SBS7a/b)

68 yields almost uniquely C>T substitutions in CC and CT contexts<sup>10,11</sup>, which can only result in  
69 the accumulation of biallelic parallel mutations. In contrast, in a case of oesophageal  
70 adenocarcinoma, the interplay between SBS17a and b<sup>10,11</sup> results in various substitutions of T  
71 in a **CTT** context, generating both parallel and divergent variants. Back and forward mutation  
72 may occur when the variant allele retains considerable mutability. A case of biliary  
73 adenocarcinoma shows SBS1 (ageing) in combination with SBS21 and 44 (mismatch  
74 repair)<sup>10,11</sup>, which can result in A[T<>C]G and G[T<>C]G back mutation. An example of  
75 forward mutation comes from lung adenocarcinoma, in which tobacco smoking (SBS4)<sup>10,11</sup>  
76 drives C[C>A]C substitutions which can be followed by G[T>A]G, appearing as a single  
77 C[C>T]C change.

78  
79 Encouraged by the simulation results, we set out to directly detect biallelic mutations in the  
80 bulk sequenced PCAWG tumours. Parallel mutation increases the variant allele frequency  
81 (VAF) and may be distinguished from local copy number gains by comparing the VAF to the  
82 allele frequencies of neighbouring heterozygous SNPs, taking tumour purity and total copy  
83 number into account (**Methods**). Additionally, when proximal to a heterozygous germline  
84 variant, read phasing information can also evidence independent mutation of both alleles. This  
85 dual-pronged approach is illustrated for melanoma DO220906, where we identify a total of  
86 480 parallel mutations, 74 of which are supported by phasing data (**Figure 3a,b, Table S3**).  
87 Leveraging SNV-SNP phasing, we estimate our VAF-based approach shows a median  
88 precision of 86.8% and recall of 54.5% (**Methods**). No parallel mutations are called in regions  
89 with loss of heterozygosity, as they cannot be distinguished from early mutations followed by  
90 copy number gains.

91  
92 Likewise, divergent mutations can be picked up by variant callers but are traditionally  
93 considered artefacts and filtered out<sup>4</sup>. As neither the PCAWG consensus nor the four  
94 contributing variant callers report divergent mutations, we recall mutations with Mutect2 for  
95 195 relevant cases, allowing up to two alternative alleles instead of one (**Methods**). In  
96 melanoma DO220906, this yields 8 divergent mutations: 1 with two novel alleles and 7 which  
97 add a second alternative allele to a PCAWG consensus variant (**Figure 3c, Table S3–4**).  
98 Overall, recalling identifies a median 96.3% of consensus variants and adds 9.5% novel  
99 variants, with 0.04% of the latter contributed by divergent mutations (**Figure S1, Table S4**).  
100 For 90% of divergent mutations, one of the two alternate alleles is already reported in the  
101 PCAWG consensus.

102

103 In total, we identify 5,330 divergent mutations, 15,167 parallel SNVs and 29 dinucleotide  
104 variants in 722 (26.0%) PCAWG samples (**Tables S4–5**). We reveal 8 candidate biallelic driver  
105 events, including parallel nonsense mutations in tumour suppressors *ASXL2* and *CDKN2A*  
106 (**Table S6**). VAF outlying parallel mutations confirmed by phasing to proximal SNPs are found  
107 in cases of hepatocellular carcinoma and pancreatic adenocarcinoma with as few as 8,892 and  
108 8,941 SNVs (**Figure 4**). Likewise, divergent mutations matching the predicted types are  
109 repeatedly identified in oesophageal adenocarcinoma samples with 20,000-30,000 SNVs,  
110 while they are absent from melanoma cases with a similar total mutation burden. On the other  
111 end of the spectrum, phasing indicates that two ultra-hypermutated colorectal adenocarcinomas  
112 each boast around 8,000 parallel and 1,700 divergent mutations.

113

114 As hinted above (**Figure 2d**), biallelic mutations are expected to carry a mutational footprint  
115 determined by, but distinct from, the overall mutational profile. For example, as parallel  
116 mutations require two independent and identical hits, they are predicted to show a mutation  
117 spectrum similar to the square of that of the regular SNVs (**Figure 5a,b**). Indeed, the observed  
118 biallelic mutations are better explained by the simulated violation spectra than the overall  
119 mutation spectra ( $p = 1.47 \times 10^{-2}$  and  $1.35 \times 10^{-8}$  for parallel and divergent, respectively, median  
120 simulated–observed cosine similarities 0.945 and 0.944, Mann–Whitney  $U$ , samples with  $\geq 10$   
121 violations). This further supports the accuracy of our biallelic mutation calls, excluding major  
122 contributions from sequencing and alignment artefacts, missed germline variants, undetected  
123 focal tandem duplicator phenotypes, precursor lesions or an as yet unknown somatic gene  
124 conversion process.

125

126 While there is a close match between the simulated and observed biallelic mutation spectra,  
127 the assumption of a uniform distribution results in a gross underestimate of the number of  
128 observable violations. Various melanomas and oesophageal adenocarcinomas harbour over 8  
129 to 32-fold excess biallelic mutations (**Figure 5c**). In contrast, the neighbour resampling model  
130 is more accurate, confirming that the effective genome size perceived by various mutational  
131 processes is only a fraction of the callable human genome (**Figures 3c and 5d, Methods**).

132

133 Non-uniformity of the mutation rate should result in more biallelic mutations at loci with a  
134 higher mutability (*i.e.* hot spots). Indeed, the fraction of loci with biallelic hits can be seen to  
135 increase along with the mutation rate as observed in the PCAWG cohort (**Figure S2**). In

136 addition, recurrent biallelic events suggest a high base-wise mutation rate at some positions in  
137 the genome (**Figure 6a**). The most frequently hit locus is the promoter of *RPL18A*  
138 (chr19:17,970,682), showing three parallel violations and one biallelic variant, accounting for  
139 8 independent hits, all in melanoma (**Figure S3**). Across PCAWG, 9 more melanomas carry  
140 monoallelic SNVs at this position (12% total)<sup>13</sup>. Differential motif enrichment at loci with  
141 biallelic vs. trinucleotide-matched monoallelic hits in melanoma reveals enrichment of  
142 **YCTTCCGG** and **WTTTCC** motifs (**Figure 6a,b**)<sup>14</sup>. **YCTTCCGG** motifs are recognised by  
143 E26 transformation-specific (ETS) transcription factor family members. Binding has been  
144 shown to render them more susceptible to UV damage due to a perturbation of the **TpC** C5–  
145 C6 interbond distance  $d$  and torsion angle  $\eta$ , favouring cyclobutane pyrimidine dimer  
146 formation (**Figure 6c,d**)<sup>15,16</sup>. The **WTTTCC** motif matches the recognition sequence for  
147 Nuclear factor of activated T-cells (NFAT) transcription factors<sup>17,18</sup>. Analysis of crystal  
148 structures of NFATc1–4 in complex with its cognate DNA indicates that binding induces  
149 similar, albeit less outspoken, conformational changes to the **TpC** dinucleotide which may  
150 explain its increased UV-mutability (**Figure 6d**).

151  
152 Motif enrichment analysis on bi- vs. monoallelic sites from colorectal adenocarcinoma reveals  
153 special cases of the sequence contexts of SBS10a/b and SBS28, which are associated with Pol  $\epsilon$   
154 exonuclease domain mutations (**Figure 6a,e**)<sup>10,11,19</sup>. **AWTTCT** and **TTCGAA** carry extra  
155 adenosine and thymine bases surrounding the regular trinucleotide context of the mutated C in  
156 SBS10, a preference also observed in the recent extension from tri- to pentanucleotide  
157 contexts<sup>11</sup>. It is unclear how these additional bases contribute to the mutability of these motifs.  
158 A 5mC mutator phenotype of *POLE*-mutant cancers has been described however<sup>20</sup>, and we  
159 confirm methylation of these loci in normal colon (median methylation rate 0.84, one-sided  
160 Mann–Whitney  $U$  test vs. background,  $p = 4.87 \times 10^{-5}$ ), providing context for the latter motif.  
161 In case of the SBS28 hypermutable motif **AAATTT**, the presence of an AAA stretch upstream  
162 of the mutated T is also yet to be explained. Likewise, AT-rich sequences surrounding the  
163 canonical SBS17-mutable trinucleotide context **CTT** can render some loci hypermutable in  
164 oesophageal and stomach adenocarcinomas (**AAACTTA** motif; **Figure 6a,e**). Pentanucleotide  
165 mutational signatures confirm the local AT-bias<sup>11</sup> and it is tempting to speculate secondary  
166 structure could be involved.

167  
168 Last, it is worth highlighting recurrent (biallelic) mutation at chr6:142,706,206, in an intron of  
169 *ADGRG6* (**Figure 6a**). The **CTCTTTGTAT-GTTC-ATACAAAGAG** palindromic sequence

170 may adopt a hairpin structure, exposing the hypermutable C at the last position of a 4bp loop  
171 and rendering it susceptible to APOBEC3A deamination, in line with recent findings<sup>7</sup>.

172

173 Taken together, we identify 20,555 biallelic mutations in 26% of PCAWG cases,  
174 demonstrating how the infinite sites model breaks down at the bulk level for a considerable  
175 fraction of tumours. By extension, the model is untenable in most, if not all, tumours at the  
176 multi-sample or single cell level, as violations become increasingly frequent for larger sets of  
177 mutations and lineages (**Figure S4**). If not correctly identified, biallelic mutations confound  
178 variant interpretation, ranging from driver inference to subclonal clustering and timing  
179 analyses, as well as phylogenetic inference. Nevertheless, at-scale detection of biallelic  
180 mutations affords an intimate look at previously hidden features of the mutational processes  
181 operative in cells, such as hot spots, hypermutable motifs and the molecular mechanisms of  
182 DNA damage and repair. These observations underscore the need for accurate models of  
183 mutation rates and tumour evolution as well as careful interpretation of allele frequencies,  
184 phasing data and driver inference.

185 **Figure legends**

186 **Figure 1 | Possible violations of the infinite sites assumption in a single clonal lineage**

187 Two subsequent mutations at a diploid locus can affect the same or alternate alleles. Depending  
188 on the base changes, there are four scenarios: biallelic parallel or divergent mutations affect  
189 separate alleles, whereas monoallelic forward and back mutation hit the same allele twice.

190

191 **Figure 2 | Simulated landscape of infinite sites violations in the PCAWG cohort**

192 (a) Number and type of infinite sites violations in 147 PCAWG samples with  $\geq 1$  expected  
193 violation under a uniform mutation distribution. Bar height indicates the expected number of  
194 violations and coloured subdivisions represent the fractions contributed by each violation type.  
195 Tumour histology of the samples is colour-coded below the bars. The four samples highlighted  
196 in (d) are indicated. (b) Comparison of the expected biallelic violations from the uniform  
197 permutation and neighbour resampling models. Every dot represents a tumour simulated 1000x  
198 with each model. Colour and size reflect, respectively, tumour type and the cosine similarity  
199 of the predicted infinite sites violation mutation spectra. (c) Box and scatterplot showing the  
200 effective genome size perceived by the mutational processes per cancer type, as estimated from  
201 the per sample differences between simulation approaches. The dashed line indicates the  
202 callable genome size. (d) Mutational spectra of four tumours with distinct violation  
203 contributions indicated in (a). The 16 distinct trinucleotide contexts are provided on the x-axis  
204 for C>A type substitutions and are the same for each coloured block. The proportion of parallel,  
205 divergent, back and forward mutation is indicated in the stacked bar on the right. Frequent  
206 combinations of mutations leading to specific infinite site violations are highlighted.

207

208 **Figure 3 | Detecting biallelic mutations in a case of melanoma**

209 (a) Tumour allele-specific copy number and binned mutation copy number (hexagons) plotted  
210 for chromosomes 1–5 of melanoma DO220906. Somatic SNVs with a mutation copy number  
211 exceeding that of the major allele (and equal to the total copy number) are evident, suggesting  
212 biallelic parallel mutation events. Error bars represent the posterior 95% highest density  
213 intervals. (b,c) IGV visualisation of DO220906 tumour (top) and matched normal (bottom)  
214 sequencing data at two loci, illustrating how read phasing information can confirm independent  
215 mutation of both parental alleles for (b) parallel and (c) divergent mutations detected after  
216 recalling using Mutect2 (**Methods**). Reads (horizontal bars) are downsampled for clarity and  
217 local base-wise coverage is indicated left of the histograms.

218

219 **Figure 4 | Landscape of biallelic mutations across PCAWG**

220 Number of observed parallel (red) and divergent (blue) mutations plotted in context of the total  
221 SNV burden for 84 PCAWG samples with  $\geq 1$  phasing-confirmed VAF hit. The range of  
222 parallel mutations expected purely from SNV-SNP phasing is also indicated (95% confidence  
223 interval, red vertical bars) as this approach is less sensitive to purity and copy number state  
224 than the VAF-based analysis. Samples for which the number of divergent mutations is not  
225 shown, were not considered for Mutect2 recalling.

226

227 **Figure 5 | Comparison between observed and simulated biallelic mutations**

228 (a) Bar chart highlighting the mutation spectrum of observed and predicted parallel mutations  
229 as well as the background SNVs for melanoma DO47331. Cosine similarities between the  
230 spectra are indicated. (b) Similar as (a) but showing divergent mutations for oesophageal  
231 adenocarcinoma DO50406. Bars are stacked to reflect the frequency of the colour-coded base  
232 changes indicated on top. Error bars represent the posterior 95% highest density intervals. (c,d)  
233 Scatterplots of the observed vs. expected number of biallelic mutations (parallel + divergent)  
234 for all PCAWG samples for the uniform permutation (c) and neighbour resampling models (d).  
235 A spline regression fit is shown together with the Pearson correlation.

236

237 **Figure 6 | Biallelic mutations reveal tumour type-specific mutational hot spot contexts**

238 (a) Heatmap of the fifty most frequently mutated loci in PCAWG with at least one biallelic  
239 mutation. The number of parallel/divergent mutations at each site is indicated, as are gene  
240 annotations, the underlying mutational processes, and the local sequence context with  
241 emerging motifs. For chr6:142,706,206, part of the stem and loop of a local sequence  
242 palindrome are indicated. MSI, microsatellite instability. (b) Sequence logos of motifs  
243 enriched at loci with biallelic mutations in melanoma (top) and corresponding transcription  
244 factor recognition sequences (bottom). (c) Superposition of TpC dinucleotides in crystal  
245 structures of ETS-bound (GABP), NFAT-bound (NFAT1c) and free B-DNA (PDB IDs,  
246 1AWC, 1OWR and 1BNA, respectively). The distance  $d$  between the midpoints of the two  
247 adjacent C5–C6 bonds as well as their torsion angle is indicated. (d) Scatter plot showing the  
248 distances and angles indicated in (c) as observed in crystal structures from the RCSB protein  
249 data bank. (e) Sequence logos of motifs enriched at loci with biallelic mutations in colorectal  
250 adenocarcinoma (SBS10, 28) and oesophageal/stomach adenocarcinoma (SBS17).

251



252 **Supplementary figure legends**

253 **Figure S1 | Variant recalling results on 195 PCAWG tumours**

254 Dot plot showing the total number of PCAWG consensus SNV calls and the number of  
255 divergent mutations identified after recalling with Mutect2 (top). Fraction of PCAWG  
256 consensus calls recovered during recalling and fraction of new calls (bottom).

257

258 **Figure S2 | Loci with biallelic mutations have higher intrinsic mutability**

259 The fraction of loci with biallelic mutations is plotted for loci with 1, 2, ..., 7 monoallelic SNVs  
260 across PCAWG. Loci are further stratified per trinucleotide context. Bootstrap resampling is  
261 performed to obtain 95% confidence intervals.

262

263 **Figure S3 | Recurrent mono- and biallelic mutation of the *RPL18A* promoter**

264 Histograms of read and base coverage in 13 melanoma tumour-normal pairs showing mono-  
265 or biallelic mutation of the ETS-binding TCTTCCG motif at the *RPL18A* promoter.

266

267 **Figure S4 | Infinite sites violations in a multi-sample setting**

268 Simulation results showing how the number of infinite sites violations increases when multiple  
269 samples are considered, each with the indicated mutational load (coloured lines). Gray bands  
270 indicate 95% confidence intervals of a spline fit.

271

272

273 **Supplementary tables**

274 **Table S1 | Uniform permutation-based infinite sites simulation results**

275 Number of biallelic parallel and divergent, and forward and backwards-type infinite sites  
276 violations in 1000 simulations using a uniform permutation approach across the callable  
277 genome

278

279 **Table S2 | Neighbour resampling-based infinite sites simulation results**

280 Number of biallelic parallel and divergent-type infinite sites violations in 1000 simulations of  
281 a resampling-based approach using tumours of the same cancer type with similar mutational  
282 processes.

283

284 **Table S3 | Mutect2 variant calling in 195 PCAWG samples**

285 For each sample – selected for its likelihood of harbouring biallelic divergent mutations or  
286 belonging to the same cohort of samples with a high likelihood – variant calls are compared  
287 to the PCAWG consensus SNV calls and the number of biallelic mutations is given.

288

289 **Table S4 | Biallelic divergent mutations in 195 PCAWG samples**

290 List of identified biallelic divergent mutations with read counts and additional quality control  
291 metrics.

292

293 **Table S5 | Biallelic parallel mutations in PCAWG**

294 List of all identified biallelic parallel mutations in PCAWG with read counts and additional  
295 quality control metrics.

296

297 **Table S6 | Candidate biallelic driver mutations**

298 List of all nonsynonymous biallelic mutations in known cancer driver genes (COSMIC and  
299 PCAWG consensus driver gene lists).

300

301 **Acknowledgements**

302 This work was supported by the Francis Crick Institute, which receives its core funding from  
303 Cancer Research UK (FC001202), the UK Medical Research Council (FC001202), and the  
304 Wellcome Trust (FC001202). This project was enabled through access to the MRC eMedLab  
305 Medical Bioinformatics infrastructure, supported by the Medical Research Council (grant  
306 number MR/L016311/1). JD is a postdoctoral fellow of the European Union's Horizon 2020  
307 research programme (Marie Skłodowska-Curie Grant Agreement No. 703594-DECODE) and  
308 the Research Foundation–Flanders (FWO 12J6916N). PVL is a Winton Group Leader in  
309 recognition of the Winton Charitable Foundation's support towards the establishment of The  
310 Francis Crick Institute. This research was funded in part by the Wellcome Trust (FC001202).  
311 For the purpose of Open Access, the authors have applied a CC BY public copyright licence  
312 to any Author Accepted Manuscript version arising from this submission. The authors would  
313 like to thank Paul C. Boutros for constructive criticism of the manuscript.

314

## 315 **Online methods**

### 316 **Singe Nucleotide Variant calling**

317 Consensus single and multi-nucleotide variant calls are obtained from the ICGC-TCGA  
318 PCAWG project<sup>12</sup>. Briefly, these calls were constructed according to a "2+ out of 4" strategy,  
319 where calls made by at least two callers (the three Broad, EMBL/DKFZ, and Sanger core  
320 PCAWG pipelines, plus MuSE v1.0) were selected as consensus calls. Post-merging, these  
321 calls were subject to further quality control including filtering against oxidative artefacts  
322 (OxoG) and alignment (BWA vs. BLAT) or strand biases resulting from different artefact-  
323 causing processes, as well as checks for tumour-in-normal and sample cross-contamination.  
324 Crucially, great care was taken to avoid "bleed-through" of germline variants into the somatic  
325 mutation calls. Specifically, absence from the Broad panel-of-normals based on 2,450 PCAWG  
326 samples and a higher read coverage ( $\geq 19$  reads with at most one read reporting the alternate  
327 allele) in the matched normal sample were required to call a somatic mutation at one of the  
328  $>14\text{M}$  common ( $>1\%$ ) polymorphic loci of the 1000 genomes project. SNVs that overlapped a  
329 germline SNV or indel call in the matched normal were also removed. Sensitivity and precision  
330 of the final consensus somatic SNV calls were 95% (90% confidence interval, 88–98%) and  
331 95% (90% confidence interval, 71–99%), respectively, as evaluated by targeted deep-  
332 sequencing validation<sup>12</sup>. Of note, 18 biallelic parallel mutations identified here were covered  
333 by the PCAWG validation effort with 17 passing and one not being observed.

334

335 To identify biallelic divergent variants, which are filtered out in PCAWG, we recalled variants  
336 on 195 non-graylisted PCAWG tumour-normal pairs (that do not show any tumour-in-normal  
337 contamination) where we might reasonably expect to find such mutations according to our  
338 uniform permutation simulations. Included also, as an internal control, are all other samples  
339 from the Australian PCAWG melanoma cohort (MELA-AU) which meet these criteria but in  
340 which we do not expect biallelic divergent mutations. SNVs and indels are called using  
341 Mutect2 (GATK v4.0.8.1) on the base quality score-recalibrated PCAWG bam files and  
342 filtered following best practices<sup>21</sup>. The Genome Aggregation Database (gnomAD) was  
343 provided as a germline resource for population allele frequencies and an additional panel of  
344 normals was also derived from all matched normal cases. To prevent filtering of biallelic  
345 variants, FilterMutectCalls is run with the `--max-alt-allele-count` flag set to 2. Additional  
346 filtering against potentially missed germline SNPs was done by requiring a posterior  
347 probability for the alternative allele to be germline ( $P_{\text{GERMLINE}} < -1$  for both of the

348 alternate alleles and requiring a minimal depth of 19 high quality reads (mapping quality  $\geq 35$   
349 and base quality  $\geq 20$ ) in the matched normal sample.

350

### 351 **Consensus copy number, purity and ploidy**

352 PCAWG consensus copy number profiles were obtained from Dentre *et al.*<sup>3</sup>. Briefly, we first  
353 segmented each cancer's genome into regions of constant copy number using six individual  
354 copy number callers. Segment breakpoints were based on the PCAWG consensus structural  
355 variants (SVs) complemented with high-confidence breakpoints identified by several of the  
356 copy number callers. The six callers were then re-run, enforcing this consensus segmentation  
357 as well as separately established consensus tumour purity and ploidy values, to determine the  
358 allele-specific copy number of each segment. The allele-specific copy number calls were then  
359 combined into a consensus profile using a multi-tiered approach and segments were assigned  
360 a level of confidence.

361

### 362 **Simulating infinite sites violations**

363 To estimate the number of infinite sites violations in tumours, we developed two distinct  
364 simulation approaches leveraging the SNV calls in the PCAWG cohort.

365

366 Our first simulator (termed uniform permutation model) resamples the observed SNVs in a  
367 tumour uniformly across the callable regions of the chromosomes, according to the observed  
368 trinucleotide-based mutational spectrum. A single simulation proceeds as follows. First, the  
369 total mutational load  $n_{t,sim}$  is resampled from a gamma-Poisson mixture where the Poisson  
370 rate parameter  $\lambda \sim \text{Gamma}$  with mode equal to the observed mutational load  $n_{t,obs}$  and a  
371 standard deviation  $\sigma = 0.05 \times n_{t,obs}$ . That is:  $n_{t,sim} \sim \text{Poisson}(\lambda \sim \text{Gamma}(r, \beta))$  where

372 the rate of the Gamma distribution  $r = n_{t,obs} + \frac{\sqrt{n_{t,obs}^2 + 2\sigma^2}}{2\sigma^2}$  and the shape  $\beta = 1 +$

373  $n_{t,obs} \times r$ . Mimicking the observed distribution, these mutations are then divided across the  
374 chromosomes according to a Dirichlet-multinomial model with  $n_{t,sim}$  trials and parameter  
375 vector  $\alpha$  where  $\alpha_i$  is equal to 1 + the total mutational burden on chromosome  $i$ . That is:

376  $\mathbf{n}_{sim} \sim \text{Mult}(n_{t,sim}, \pi \sim \text{Dir}(\alpha))$  with  $\alpha = (n_{1,obs}, n_{2,obs}, \dots, n_{X,obs}) + \mathbf{1}$ . Next, mutation

377 spectra per chromosome ( $\pi_i$ ) are sampled from a Dirichlet distribution with parameter vector

378  $\mu_i$  where  $\mu_{i,j}$  is equal to a pseudocount  $\psi_j$  derived from the overall mutational spectrum plus

379 the observed number of mutations of type  $j$  on chromosome  $i$ . That is:  $\boldsymbol{\pi}_i \sim \text{Dir}(\boldsymbol{\mu}_i)$  with  $\boldsymbol{\mu}_i =$   
380  $(\mu_{i,A[C>A]A,obs}, \mu_{i,A[C>G]A,obs}, \dots, \mu_{i,T[T>G]T,obs}) + \psi$  with  $\psi =$   
381  $(\mu_{t,A[C>A]A,obs} + 1, \mu_{t,A[C>G]A,obs} + 1, \dots, \mu_{t,T[T>G]T,obs} + 1) \times 23 / n_{t,obs}$ . These spectra are  
382 then normalised to mutation type probabilities using the trinucleotide content on the  
383 corresponding chromosomes. In turn, the probabilities are used for rejection sampling of  $n_{i,sim}$   
384 mutations at trinucleotides sampled uniformly along the two (diploid) copies of the callable  
385 parts of chromosome  $i$ . The resulting mutation spectra are indistinguishable from the observed  
386 spectrum of the sample. During simulation, the algorithm keeps track of which allelic positions  
387 have been mutated and considers them accordingly for (i) biallelic parallel mutation, where  
388 two alleles independently mutate to the same alternate base; (ii) biallelic divergent mutation,  
389 by independent mutation of two alleles each to another base; (iii) back mutation, whereby an  
390 earlier introduced variant is mutated back to the wild type; and (iv) forward mutation, where  
391 an earlier variant is mutated to another. Simulations are repeated 1,000 times for each sample  
392 and the totals, median and 95% intervals are reported for each violation type and context.

393

394 In a second simulation approach (termed neighbour resampling model), we resample without  
395 replacement the mutational landscape of a tumour from the pooled SNVs of representative  
396 PCAWG tumours. In this context, we define a tumour as representative for the simulation target  
397 when it is of the same tumour type (PCAWG histology) and has similar mutational signature  
398 exposures (cosine similarity of their mutation spectra  $\geq 0.9$ ). Note that this approach allows to  
399 simulate biallelic events but not back and forward mutation. We further exclude all graylisted  
400 and non-preferred multi-sample tumours as well as 21 prostate cancer cases from the PRAD-  
401 CA cohort which were suspect of contamination harbouring excess low VAF SNV calls in  
402 repetitive regions.

403

#### 404 **Identification of parallel mutations – allele frequencies**

405 Parallel mutation increases the variant allele frequency, which can be picked up by comparing  
406 it to the B-allele frequency (*BAF*) of local heterozygous SNPs, taking tumour purity and local  
407 total copy number ( $\log R$ ) into account. In the first part of the approach, we obtain phased *BAF*  
408 values and  $\log R$  as an intermediate output of the Battenberg copy number calling pipeline<sup>3</sup>.  
409 Briefly, allele counts at 1000 Genomes v3 SNP loci are extracted from the matched tumour  
410 and normal bam files using alleleCount with a minimal base quality of 20 and mapping quality  
411 of 35. Heterozygous SNPs are identified as having  $0.1 < \text{BAF} < 0.9$ . in the matched normal

412 sample and poorly behaving loci are filtered out (Battenberg problematic loci file). Haplotypes  
413 are imputed using Beagle5 followed by a piecewise constant fit of the phased tumour  $BAF$   
414 values and flipping of haplotype blocks with mean  $BAF < 0.5$ . Total allele counts of tumour  
415 and normal are converted into Log R values and corrected for GC-content and replication  
416 timing artefacts.

417

418  $BAF_{seg}$  and  $\log R_{seg}$  estimates are computed for all PCAWG consensus copy number  
419 segments<sup>3</sup>. Allele counts at phased heterozygous SNPs are considered to be generated  
420 according to a beta-binomial model with  $V_i \sim Bin(n_i = V_i + R_i, p \sim Beta(BAF_{seg} \times \psi, (1 -$   
421  $BAF_{seg}) \times \psi))$  where  $V_i$  and  $R_i$  are, respectively, the observed counts of the major and minor  
422 allele of SNP  $i$ , and  $\psi$  is a sample-specific concentration parameter (*i.e.* a pseudo-coverage of  
423 the average segment). For each sample,  $\psi$  is optimised between 50 and 1000, by computing  
424 for each SNP a two-sided  $P$ -value from the beta-binomial model above and ensuring the  
425 robustly fitted slope of a QQ-plot of these  $P$ -values is equal to 1.

426

427 A similar model can subsequently be used to test whether a variant is present on a higher  
428 number of copies than the number of copies of the major allele present in the tumour. In pure  
429 tumour samples, this would be directly observable as their allele frequency exceeds that of  
430 local heterozygous SNPs on the major allele. Considering admixed normal cells, however, the  
431 maximal expected allele frequency needs to be corrected for tumour purity and total copy  
432 number of the segment. This corrected “somatic” BAF can be derived as follows:

433 
$$BAF_{som} = BAF_{seg} - \frac{1 - \rho}{(2(1 - \rho) + \rho\Psi_t)2^{\log R_{seg}}}$$

434 with  $\rho$  and  $\Psi_t$ , the PCAWG consensus tumour purity and ploidy (*i.e.* the average tumour copy  
435 number), respectively<sup>3</sup>. This amounts to subtracting from the segment  $BAF$  the contribution of  
436 the major allele from admixed normal cells.

437

438 The final beta-binomial model with  $BAF_{som}$  and  $\psi$  then describes the expected allele counts of  
439 clonal somatic variants carried on all copies of the major allele. This model is used to perform  
440 independent filtering and assess powered loci using a one-sided test for the SNVs contained on  
441 that copy number segment as  $P(V_i \geq v | V_i + R_i, BAF_{som}, \psi)$ .  $P$ -values are corrected for  
442 multiple testing according to Benjamini–Hochberg and SNVs are considered as potential  
443 parallel mutations when  $q \leq 0.1$ .

444

445 A number of additional quality checks and filters are in place to mitigate effects of potential  
446 errors and biases in allele counts, consensus genome segmentation, purity and ploidy:

447

448 i. SNVs overlapping a known (1000 genomes v3) heterozygous germline SNP in the  
449 individual are filtered out.

450 ii. The robustly fitted slope of a QQ-plot of the final SNV  $P$ -values should be  $\leq 1$ , if not,  
451 sample purity may have been underestimated and the sample is excluded.

452 iii. Candidate parallel mutations with  $\geq 2$  heterozygous SNPs within 25 bp are filtered out  
453 as these affect mapping qualities and bias allele counts.

454 iv. SNVs in regions with inferred loss of heterozygosity (copy number of the minor allele  
455 equal to 0) in the PCAWG consensus copy number are not tested. Similarly, in males,  
456 only the pseudoautosomal regions of X are considered.

457 v.  $BAF$  and  $\log R$  of proximal heterozygous SNPs on either side of a candidate variant  
458 should not represent outliers on the segment as a whole, which could indicate a missed  
459 copy number event. For the  $BAF$ , we require the two-sided beta-binomial  $P$ -values of  
460 these SNPs, as computed above, to be  $> 0.001$  and their combined  $P$ -value (Fisher's  
461 method)  $> 0.01$ . For the  $\log R$ , identical thresholds apply, with  $P$ -values derived using  
462 a two-tailed test assuming a Gaussian distribution with mean equal to the median  
463 segment  $\log R$  and standard deviation the median absolute deviation adjusted for  
464 asymptotic consistency.

465 vi. If  $BAF_{som}$  is estimated to be  $< 0.05$  for a segment, it is conservatively raised back to  
466  $BAF_{seg}$ .

467 vii. Candidate variants from tumours in which neither the permutation nor the resampling-  
468 based simulator yielded any biallelic mutations across 1000 simulations were excluded.

469

470 Further flags were included for quality control, but were not used during filtering of the final  
471 call set. (i) Candidate biallelic hits at T- and B-cell receptor loci are flagged to assess the impact  
472 of small V(D)J recombination-derived deletions in infiltrating immune cells on allele  
473 frequencies and coverage. (ii) For each variant, we checked whether it lifted over from the  
474 1000 Genomes GRCh37 build (hg19) to a single location on the hg38 assembly, also requiring  
475 the same reference base at that position. (iii) SNVs were flagged if near a somatic or germline  
476 indel (position -10 to +25) in the same sample.



477

## 478 **Identification of parallel mutations – variant phasing**

479 Phasing information is obtained for all heterozygous SNP–SNV pairs that are within 700bp of  
480 one another. We apply the following stringent filtering: count only read pairs with mapping  
481 quality  $\geq 20$ , mismatch bases quality  $\geq 25$ , no hard or soft-clipping, that are properly paired,  
482 are not flagged as duplicates and do not have a failed vendor quality control flag. Furthermore,  
483 we remove read pairs with indels and those that have  $\geq 2$  mismatches in a single read or  $\geq 3$  in  
484 the whole pair (if both phased variants are spanned by different reads in the pair).

485

486 We infer a parallel mutation when, for a heterozygous SNP–SNV pair, at least 2 reads from  
487 each allele of the SNP report the somatic variant, *i.e.* at least 2 Ref-Alt and 2 Alt-Alt reads. In  
488 addition, Ref-Alt and Alt-Alt reads each should represent  $> 10\%$  of the total phased reads. To  
489 avoid a scenario where, after a gain of the chromosome copy carrying the somatic variant, the  
490 phased allele of the heterozygous SNP is mutated to the non-phased allele, we require that the  
491 BAF of this SNP is not an outlier on the segment. As described above, this is accomplished by  
492 demanding that its two-sided beta-binomial  $P$ -value  $> 0.001$ .

493

494 While phasing info is sparse, it is less dependent on the local copy number state, purity and  
495 coverage than the VAF approach detailed above. For instance, in contrast to tests on the allele  
496 frequency, phasing to a heterozygous SNP can detect parallel mutations on a segment with  
497 copy number 2+1 where both parental alleles have only one copy mutated. Phasing results may  
498 therefore be used to evaluate the performance of the VAF approach in a sample. However, both  
499 approaches are effectively blind in regions with loss of heterozygosity. Parallel mutations can  
500 occur in these contexts when the copy number  $\geq 2$  but cannot readily be distinguished from  
501 early mutations which have occurred before the duplication.

502

503 Precision and recall of the VAF-based approach are assessed by taking all phaseable SNVs (*i.e.*  
504 SNP-SNV pairs having  $\geq 2$  reads each for the SNP Ref and Alt alleles and  $\geq 4$  reads reporting  
505 the somatic variant) which have been evaluated in the VAF pipeline. Precision is calculated as  
506 the fraction of VAF-inferred biallelic parallel mutations which are confirmed by phasing.  
507 Recall is the fraction of phasing hits picked up through their allele frequencies. Overall  
508 performance is reported as the median precision and recall for samples with  $\geq 10,000$  phaseable  
509 SNVs.

510

511 By extrapolating the rate of parallel mutation at phaseable SNVs to all testable SNVs (*i.e.* those  
512 passing the quality checks and filters listed above), we estimate the total number of parallel  
513 mutations in a sample  $i$  ( $n_{viol,i}$ ). The estimate and its uncertainty can be described using a beta-  
514 binomial:  $n_{viol,i} \sim Bin(n = n_i, p \sim Beta(n_{phas,par,i} + 0.001, n_{phas,single,i} + 0.001))$  where  
515  $n_i$  is the total number of passed SNVs,  $n_{phas,par,i}$  is the number of phasing-informed biallelic  
516 parallel mutations and  $n_{phas,single,i}$  is the number of phaseable SNVs with no phasing evidence  
517 for parallel hits.

518

### 519 **Birthday problem approximation**

520 The total number of infinite sites violations in a sample may also be roughly approximated by  
521 a variant of the birthday problem, which asks for the probability that at least two people share  
522 a birthday in a group of  $N$  random people. While this simplification ignores intricacies of  
523 genomes such as mutation types and copy number, it provides a reasonable first approximation  
524 and straightforward mathematical formulation. We start with the probability that mutation A  
525 and B hit the same locus, *i.e.* they violate the infinite sites model  $P(A = B) = 1/N$  where  $N$  is  
526 the size of the genome. From this it is easy to derive the probability they do not share a locus  
527  $P(A \neq B) = 1 - 1/N$ . The probability  $A$  does not hit the same locus as  $n$  other mutations is  
528 then  $P(A \neq B_1, \dots, B_n) = (1 - 1/N)^{n-1}$ . To obtain the expected number of mutations not  
529 sharing a locus, this probability is multiplied by the total mutation burden  $n$ . Finally, the  
530 number of infinite sites violations is then  $E[\#violations] = n_{viol} = n - n \cdot (1 - 1/N)^{n-1}$ .  
531 Given that for a human genome  $1/N \cong 3^{-10} \approx 0$ , Taylor approximation yields  $n_{viol} \cong n -$   
532  $n \cdot (1 - (n - 1)/N) \cong n^2/N$ , indicating that the number of infinite sites violations scales with  
533 the square of the total mutation burden and the inverse of the genome size.

534

### 535 **Motif enrichment**

536 To assess enrichment of specific motifs at sites with biallelic mutations, we extracted 15bp  
537 sequence contexts (+ strand where C or T is the reference base and - strand otherwise), for all  
538 parallel and divergent biallelic mutations in melanoma, colorectal, oesophageal and stomach  
539 adenocarcinomas. For every biallelic mutation, we sampled 10 mutation type-matched  
540 (trinucleotide context + alternate base) somatic SNVs from the same tumour and extracted their  
541 15bp contexts as a control set. The Multiple EM for Motif Elicitation suite of tools (STREME

542 and TomTom; v5.3.2) was used to discover sequence motifs enriched in the biallelic set relative  
543 to the control set<sup>14</sup>. In the case of melanoma, identified motifs linked to known TF recognition  
544 sequences from the HOCOMOCO Human v11 Core collection<sup>18</sup>. *P*-values were computed  
545 according to STREME and TomTom.

546

#### 547 **Structural analysis**

548 Crystal and NMR-structures for free B-DNA, NFAT- or ETS-bound DNA were obtained from  
549 the RCSB Protein Databank. The C5–C6 interbond distances  $d$  and torsion angles  $\eta$  were  
550 extracted using PyMOL at the relevant TpC dinucleotide in the ETS and NFAT recognition  
551 motifs and at non-terminal TpC dinucleotides in the free B-DNA. When multiple chains were  
552 present in a single structure, the average  $d$  and  $\eta$  were used.

553

554 **References**

- 555 1. Kimura, M. The number of heterozygous nucleotide sites maintained in a finite population  
556 due to steady flux of mutations. *Genetics* **61**, 893–903 (1969).
- 557 2. Beerenwinkel, N., Schwarz, R. F., Gerstung, M. & Markowitz, F. Cancer Evolution:  
558 Mathematical Models and Computational Inference. *Systematic Biol* **64**, e1–e25 (2015).
- 559 3. Dentre, S. C. *et al.* Portraits of genetic intra-tumour heterogeneity and subclonal selection  
560 across cancer types. *Cell* (in press). *bioRxiv* doi:10.1101/312041.
- 561 4. Li, H. A statistical framework for SNP calling, mutation discovery, association mapping  
562 and population genetical parameter estimation from sequencing data. *Bioinformatics* **27**,  
563 2987–2993 (2011).
- 564 5. Gonzalez-Perez, A., Sabarinathan, R. & Lopez-Bigas, N. Local Determinants of the  
565 Mutational Landscape of the Human Genome. *Cell* **177**, 101–114 (2019).
- 566 6. Hess, J. M. *et al.* Passenger Hotspot Mutations in Cancer. *Cancer Cell* **36**, 288–301.e14  
567 (2019).
- 568 7. Buisson, R. *et al.* Passenger hotspot mutations in cancer driven by APOBEC3A and  
569 mesoscale genomic features. *Science* **364**, eaaw2872 (2019).
- 570 8. Kuipers, J., Jahn, K., Raphael, B. J. & Beerenwinkel, N. Single-cell sequencing data reveal  
571 widespread recurrence and loss of mutational hits in the life histories of tumors. *Genome*  
572 *Research* **27**, 1885–1894 (2017).
- 573 9. McPherson, A. *et al.* Divergent modes of clonal spread and intraperitoneal mixing in high-  
574 grade serous ovarian cancer. *Nat Genet* **48**, 758–767 (2016).
- 575 10. Alexandrov, L. B. *et al.* Signatures of mutational processes in human cancer. *Nature* **500**,  
576 415 (2013).
- 577 11. Alexandrov, L. B. *et al.* The repertoire of mutational signatures in human cancer. *Nature*  
578 **578**, 94–101 (2020).
- 579 12. Campbell, P. J. *et al.* Pan-cancer analysis of whole genomes. *Nature* **578**, 82–93 (2020).
- 580 13. Rheinbay, E. *et al.* Analyses of non-coding somatic drivers in 2,658 cancer whole  
581 genomes. *Nature* **578**, 102–111 (2020).
- 582 14. Bailey, T. L. *et al.* MEME Suite: tools for motif discovery and searching. *Nucleic Acids*  
583 *Res* **37**, W202–W208 (2009).
- 584 15. Mao, P. *et al.* ETS transcription factors induce a unique UV damage signature that drives  
585 recurrent mutagenesis in melanoma. *Nat Commun* **9**, 2626 (2018).

- 586 16. Law, Y. K., Azadi, J., Crespo-Hernández, C. E., Olmon, E. & Kohler, B. Predicting  
587 Thymine Dimerization Yields from Molecular Dynamics Simulations. *Biophys J* **94**, 3590–  
588 3600 (2008).
- 589 17. Gupta, S., Stamatoyannopoulos, J. A., Bailey, T. L. & Noble, W. Quantifying similarity  
590 between motifs. *Genome Biol* **8**, R24 (2007).
- 591 18. Kulakovskiy, I. V. *et al.* HOCOMOCO: towards a complete collection of transcription  
592 factor binding models for human and mouse via large-scale ChIP-Seq analysis. *Nucleic Acids*  
593 *Res* **46**, D252–D259 (2017).
- 594 19. The Cancer Genome Atlas Network. Comprehensive molecular characterization of  
595 human colon and rectal cancer. *Nature* **487**, 330 (2012).
- 596 20. Poulos, R. C., Olivier, J. & Wong, J. W. H. The interaction between cytosine methylation  
597 and processes of DNA replication and repair shape the mutational landscape of cancer  
598 genomes. *Nucleic Acids Res* **45**, 7786–7795 (2017).
- 599 21. Auwera, G. A. *et al.* From FastQ Data to High-Confidence Variant Calls: The Genome  
600 Analysis Toolkit Best Practices Pipeline. *Curr Protoc Bioinform* **43**, 11.10.1-11.10.33 (2013).
- 601

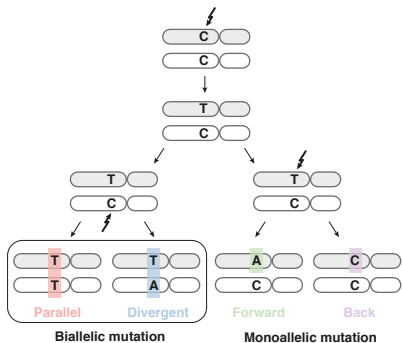

**Figure 1 | Possible violations of the infinite sites assumption in a single clonal lineage**

Two subsequent mutations at a diploid locus can affect the same or alternate alleles. Depending on the base changes, there are four scenarios: biallelic parallel or divergent mutations affect separate alleles, whereas monoallelic forward and back mutation hit the same allele twice.

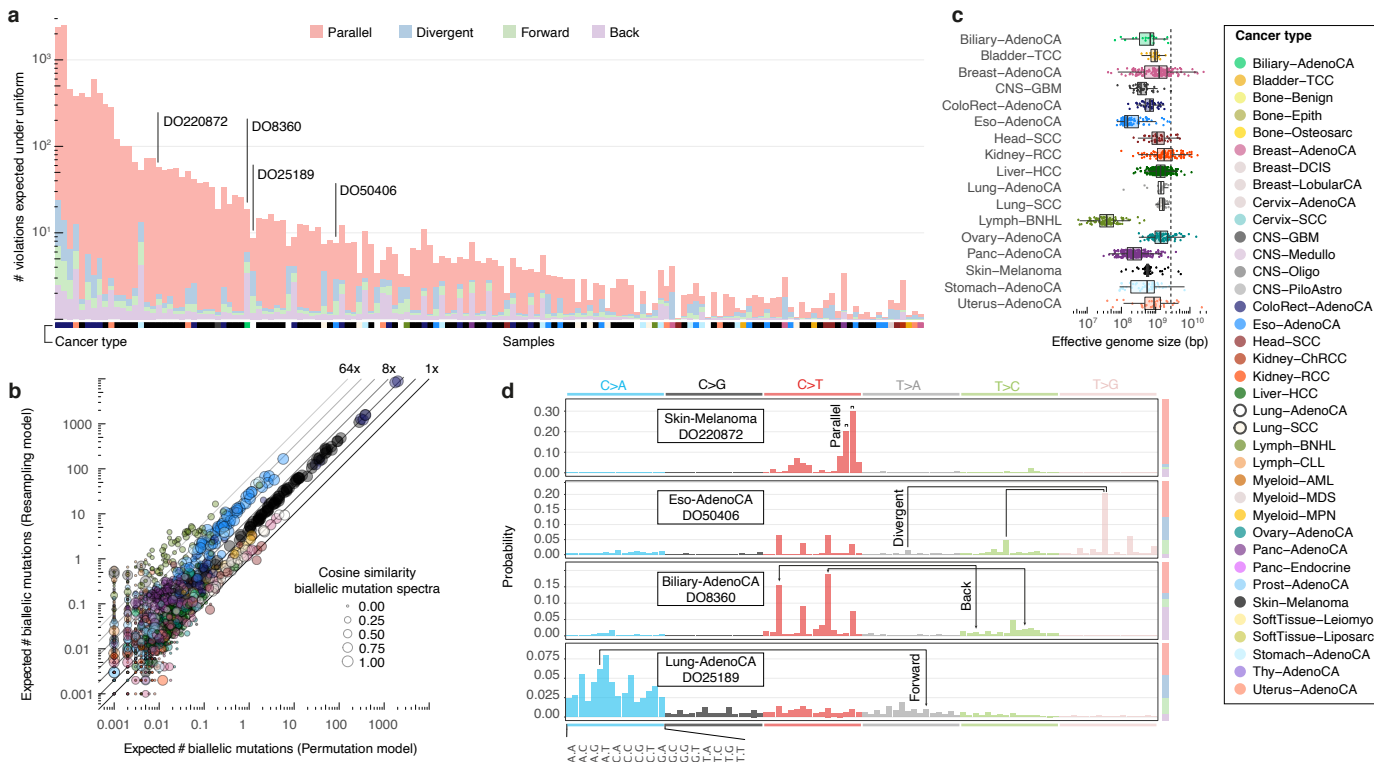

**Figure 2 | Simulated landscape of infinite sites violations in the PCAWG cohort**

(a) Number and type of infinite sites violations in 147 PCAWG samples with  $\geq 1$  expected violation under a uniform mutation distribution. Bar height indicates the expected number of violations and coloured subdivisions represent the fractions contributed by each violation type. Tumour histology of the samples is colour-coded below the bars. The four samples highlighted in (d) are indicated. (b) Comparison of the expected biallelic violations from the uniform permutation and neighbour resampling models. Every dot represents a tumour simulated 1000x with each model. Colour and size reflect, respectively, tumour type and the cosine similarity of the predicted infinite sites violation mutation spectra. (c) Box and scatterplot showing the effective genome size perceived by the mutational processes per cancer type, as estimated from the per sample differences between simulation approaches. The dashed line indicates the callable genome size. (d) Mutational spectra of four tumours with distinct violation contributions indicated in (a). The 16 distinct trinucleotide contexts are provided on the x-axis for C>A type substitutions and are the same for each coloured block. The proportion of parallel, divergent, back and forward mutation is indicated in the stacked bar on the right. Frequent combinations of mutations leading to specific infinite site violations are highlighted.

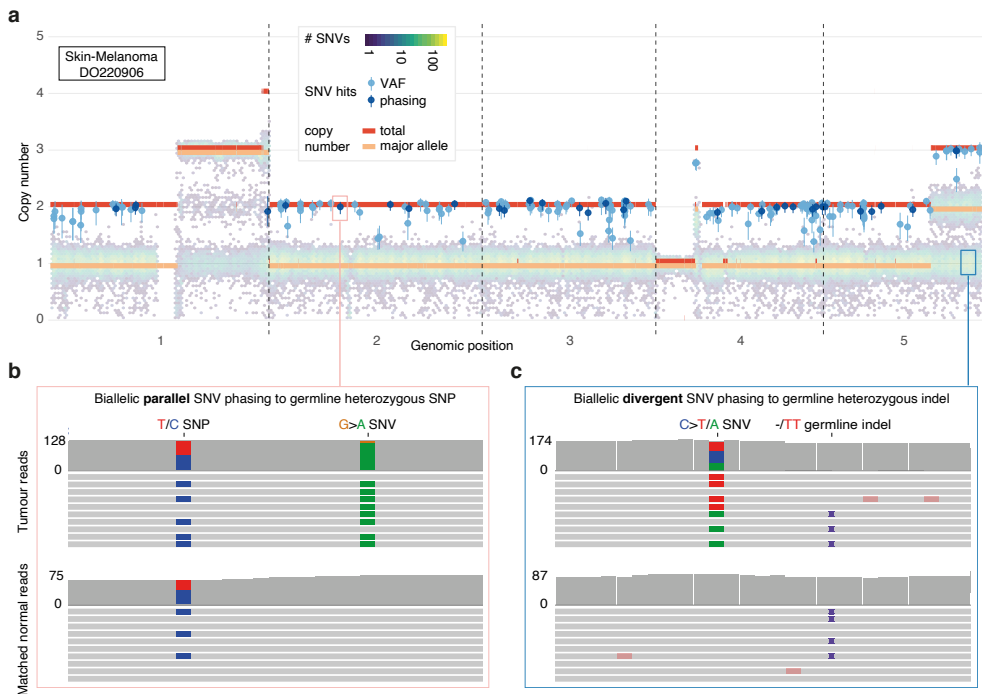

**Figure 3 | Detecting biallelic mutations in a case of melanoma**

(a) Tumour allele-specific copy number and binned mutation copy number (hexagons) plotted for chromosomes 1–5 of melanoma DO220906. Somatic SNVs with a mutation copy number exceeding that of the major allele (and equal to the total copy number) are evident, suggesting biallelic parallel mutation events. Error bars represent the posterior 95% highest density intervals. (b,c) IGV visualisation of DO220906 tumour (top) and matched normal (bottom) sequencing data at two loci, illustrating how read phasing information can confirm independent mutation of both parental –alleles for (b) parallel and (c) divergent mutations detected after recalling using Mutect2 (Methods). Reads (horizontal bars) are downsampled for clarity and local base-wise coverage is indicated left of the histograms.



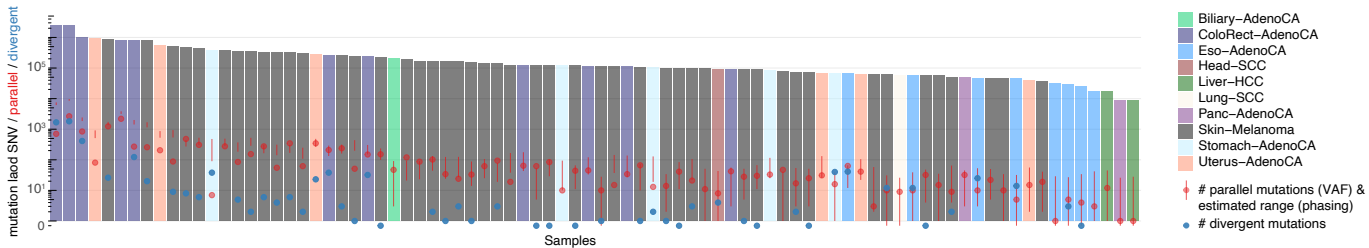

#### Figure 4 | Landscape of biallelic mutations across PCAWG

Number of observed parallel (red) and divergent (blue) mutations plotted in context of the total SNV burden for 84 PCAWG samples with  $\geq 1$  phasing-confirmed VAF hit. The range of parallel mutations expected purely from SNV-SNP phasing is also indicated (95% confidence interval, red vertical bars) as this approach is less sensitive to purity and copy number state than the VAF-based analysis. Samples for which the number of divergent mutations is not shown, were not considered for Mutect2 recalling.

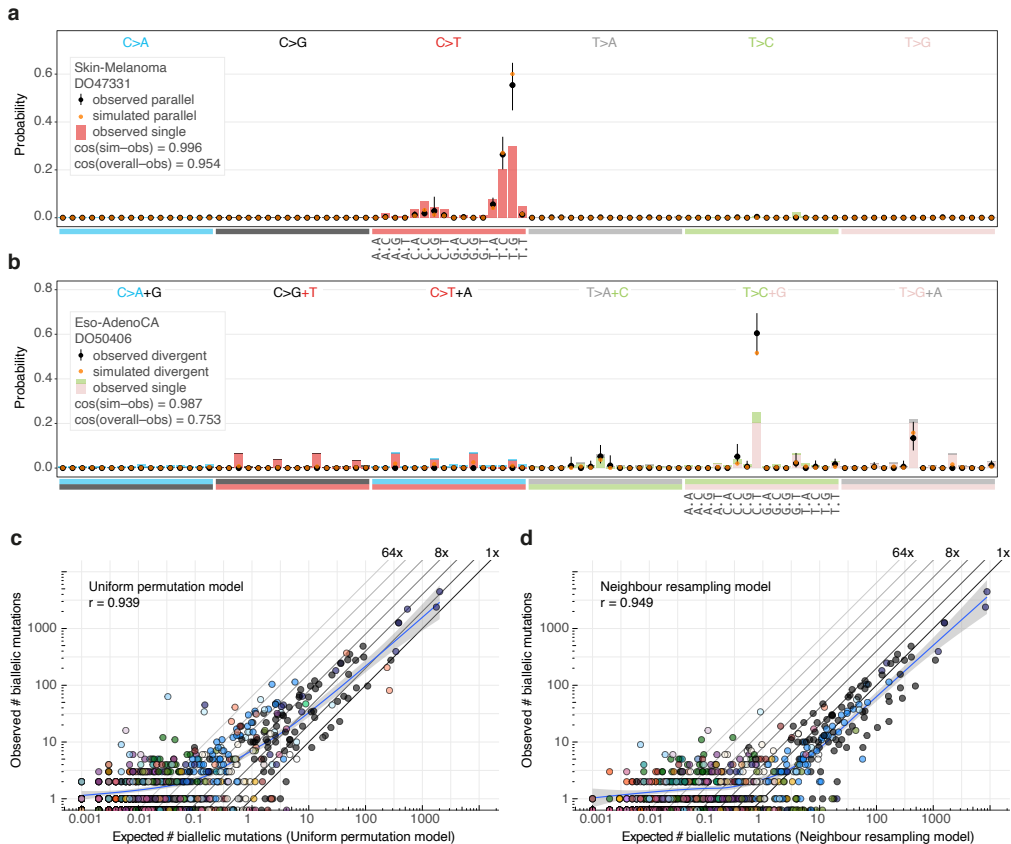

**Figure 5 | Comparison between observed and simulated biallelic mutations**

(a) Bar chart highlighting the mutation spectrum of observed and predicted parallel mutations as well as the background SNVs for melanoma DO47331. Cosine similarities between the spectra are indicated. (b) Similar as (a) but showing divergent mutations for oesophageal adenocarcinoma DO50406. Bars are stacked to reflect the frequency of the colour-coded base changes indicated on top. Error bars represent the posterior 95% highest density intervals. (c,d) Scatterplots of the observed vs. expected number of biallelic mutations (parallel + divergent) for all PCAWG samples for the uniform permutation (c) and neighbour resampling models (d). A spline regression fit is shown together with the Pearson correlation.

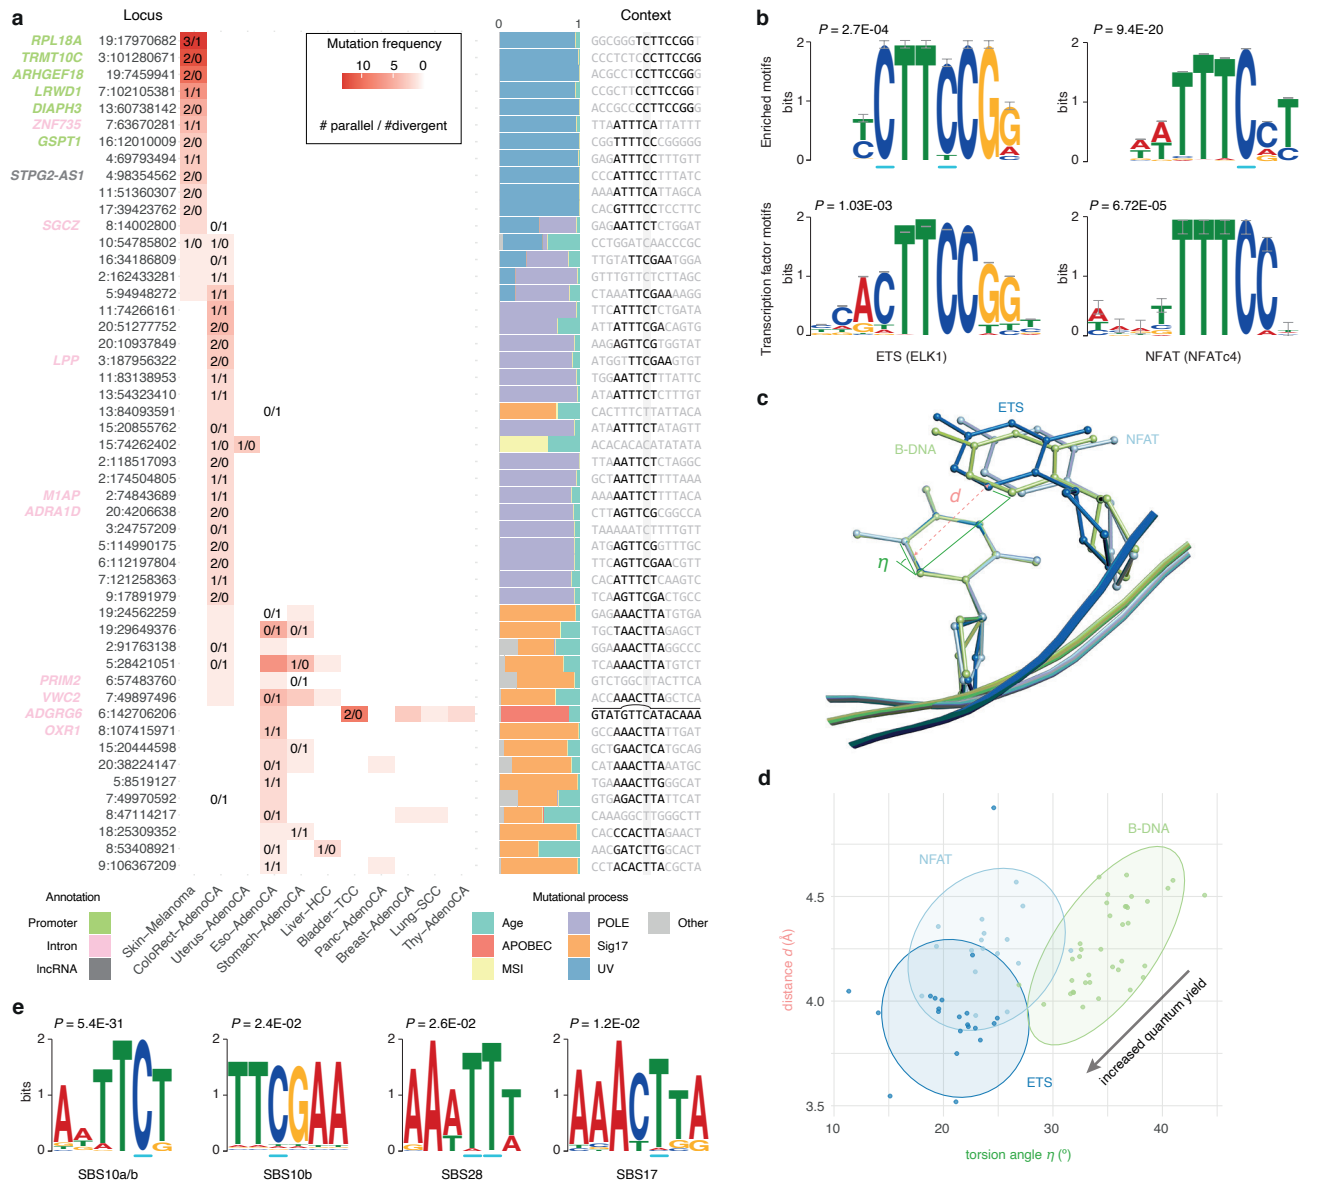

**Figure 6 | Biallelic mutations reveal tumour type-specific mutational hot spot contexts**

(a) Heatmap of the fifty most frequently mutated loci in PCAWG with at least one biallelic mutation. The number of parallel/divergent mutations at each site is indicated, as are gene annotations, the underlying mutational processes, and the local sequence context with emerging motifs. For chr6:142,706,206, part of the stem and loop of a local sequence palindrome are indicated. MSI, microsatellite instability. (b) Sequence logos of motifs enriched at loci with biallelic mutations in melanoma (top) and corresponding transcription factor recognition sequences (bottom). (c) Superposition of TpC dinucleotides in crystal structures of ETS-bound (GABP), NFAT-bound (NFAT1c) and free B-DNA (PDB IDs, 1AWC, 1OWR and 1BNA, respectively). The distance  $d$  between the midpoints of the two adjacent C5–C6 bonds as well as their torsion angle is indicated. (d) Scatter plot showing the distances and angles indicated in (c) as observed in crystal structures from the RCSB protein data bank. (e) Sequence logos of motifs enriched at loci with biallelic mutations in colorectal adenocarcinoma (SBS10, 28) and oesophageal/stomach adenocarcinoma (SBS17).

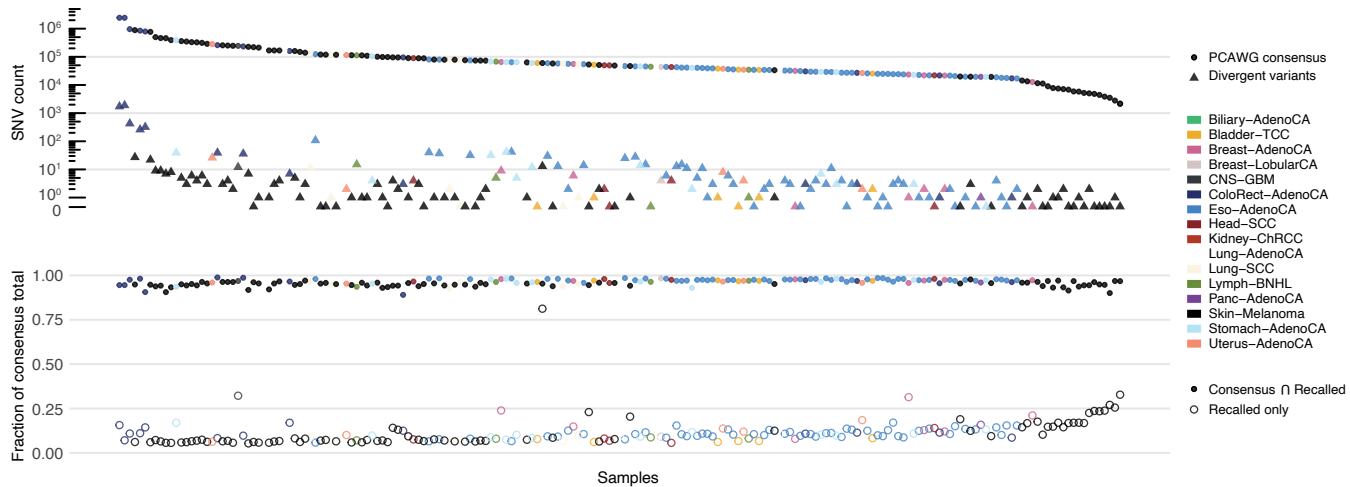

**Figure S1 | Variant recalling results on 195 PCAWG tumours**

Dot plot showing the total number of PCAWG consensus SNV calls and the number of divergent mutations identified after recalling with Mutect2 (top). Fraction of PCAWG consensus calls recovered during recalling and fraction of new calls (bottom).

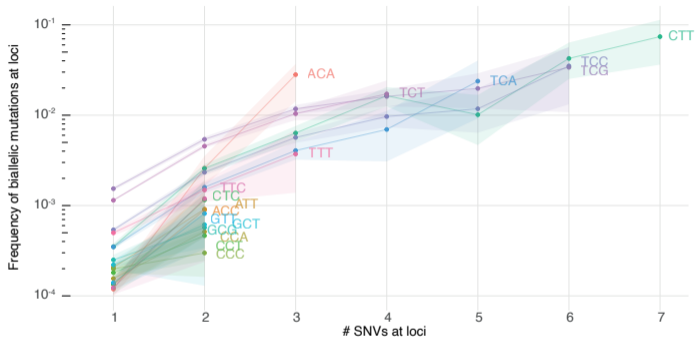

### Figure S2 | Loci with biallelic mutations have higher intrinsic mutability

The fraction of loci with biallelic mutations is plotted for loci with 1, 2, ..., 7 monoallelic SNVs across PCAWG. Loci are further stratified per trinucleotide context. Bootstrap resampling is performed to obtain 95% confidence intervals.

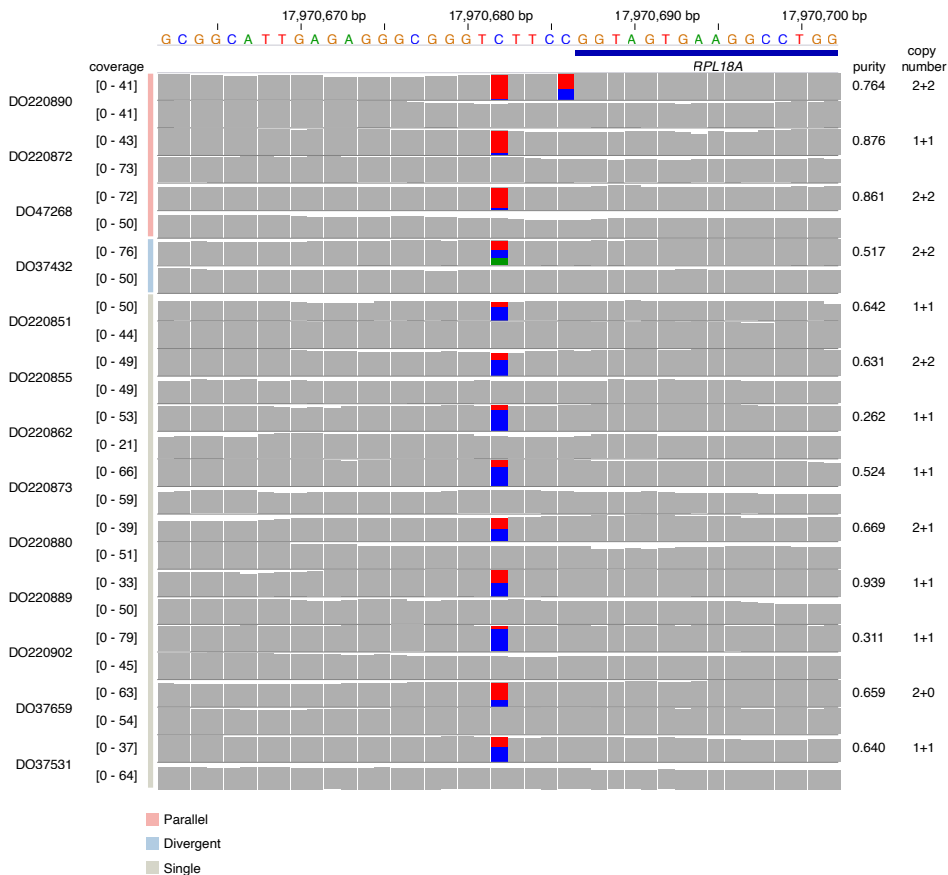

### Figure S3 | Recurrent mono- and biallelic mutation of the *RPL18A* promoter

Histograms of read and base coverage in 13 melanoma tumour-normal pairs showing mono- or biallelic mutation of the ETS-binding TCTTCCG motif at the *RPL18A* promoter.

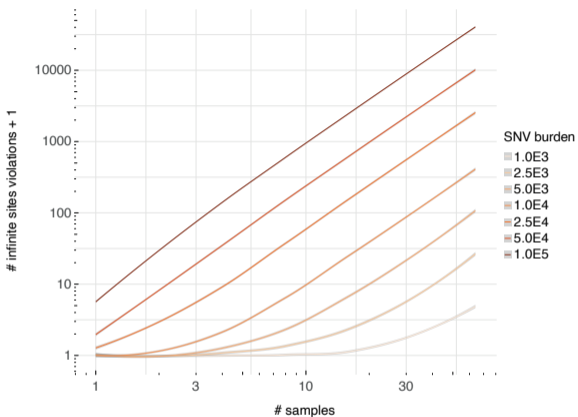

### Figure S4 | Infinite sites violations in a multi-sample setting

Simulation results showing how the number of infinite sites violations increases when multiple samples are considered, each with the indicated mutational load (coloured lines). Gray bands indicate 95% confidence intervals of a spline fit.
